# Supplementary material
Source: PubMed Central journal article supplement (PMC9419931)
Supplement: Suppl_FigS1.pdf [file Suppl_FigS1.pdf]

## Supplementary Materials

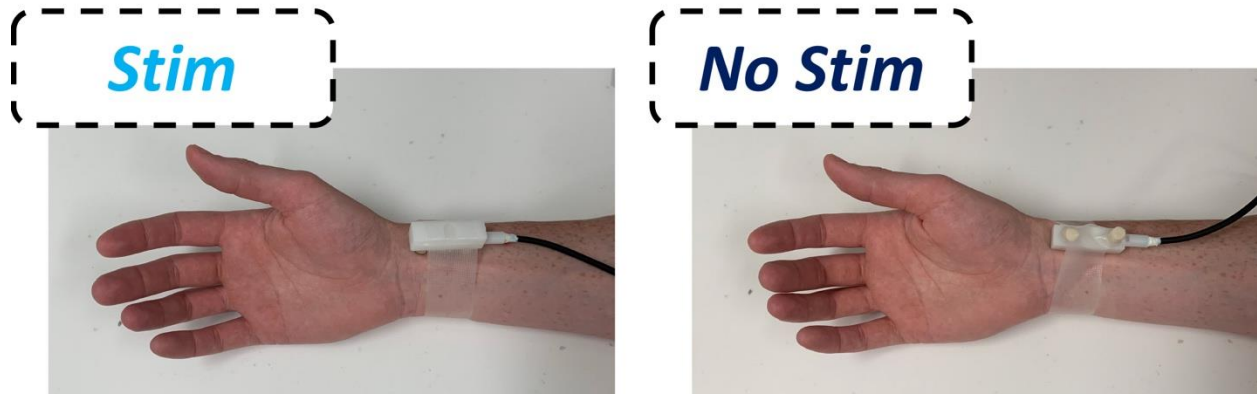

**Figure S1. Median Nerve Stimulation Protocol.** (Left): Stimulation contacts were placed on the participant's skin surface to administer subthreshold 15 Hz electrical stimulation to the right median nerve (i.e., stim condition). (Right): Stimulation contacts were turned away from the participant's skin surface (i.e., no stim condition) while retaining stimulator-related electrical noise in both runs (i.e., stim and no stim).
