# Supplementary material
Source: PubMed Central journal article supplement (PMC9419931)
Supplement: Suppl_FigS2.pdf [file Suppl_FigS2.pdf]

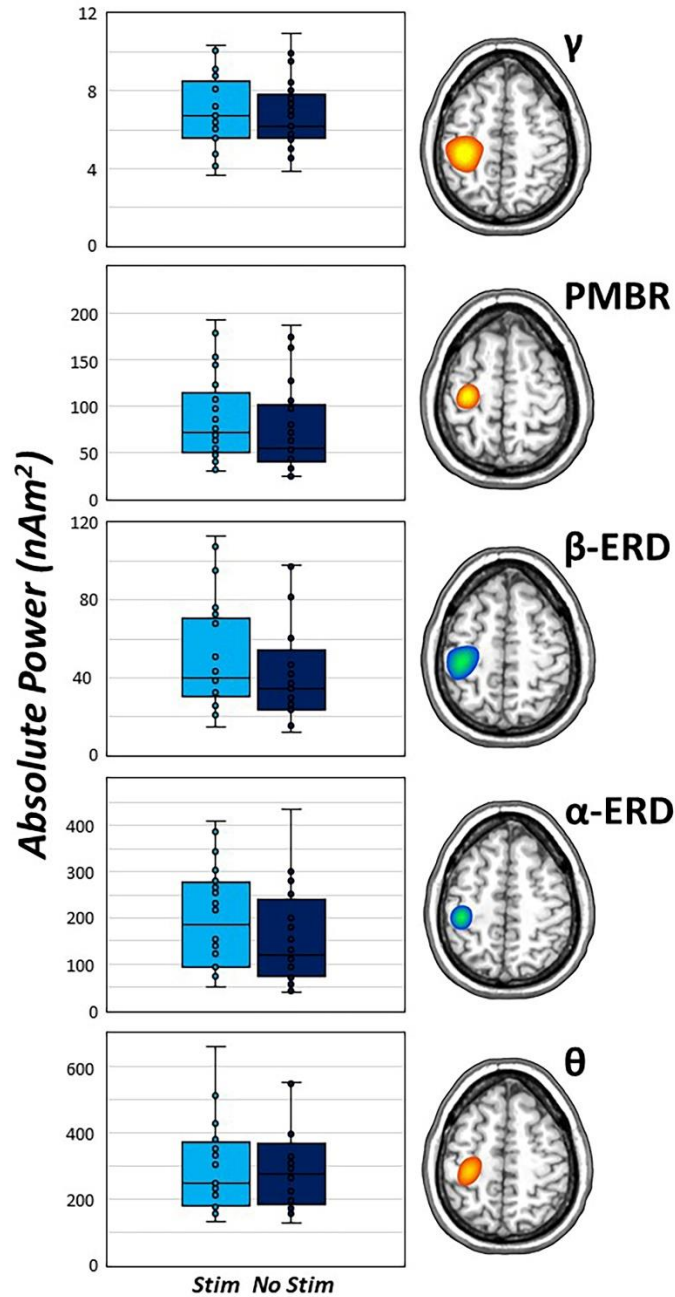

**Figure S2. Spontaneous Neural Activity is Not Affected by Somatosensory Entrainment.** Pairwise comparisons of absolute time series data (non-baseline corrected) extracted from the peak voxel of each oscillatory response. Spontaneous neural activity during the baseline was relatively similar across all frequencies in the contralateral M1.
